# Supplementary material for: Dopamine-mediated plasticity preserves excitatory connections to direct pathway striatal projection neurons and motor function in a mouse model of Parkinson’s disease
Source: PubMed Central journal article supplement — bioRxiv. 2024 May 30:2024.05.28.596192. Preprint. [Version 1] doi: 10.1101/2024.05.28.596192 (PMC11160626; doi:10.1101/2024.05.28.596192), 2024-05-30
Supplement: media-1.pdf [file media-1.pdf]

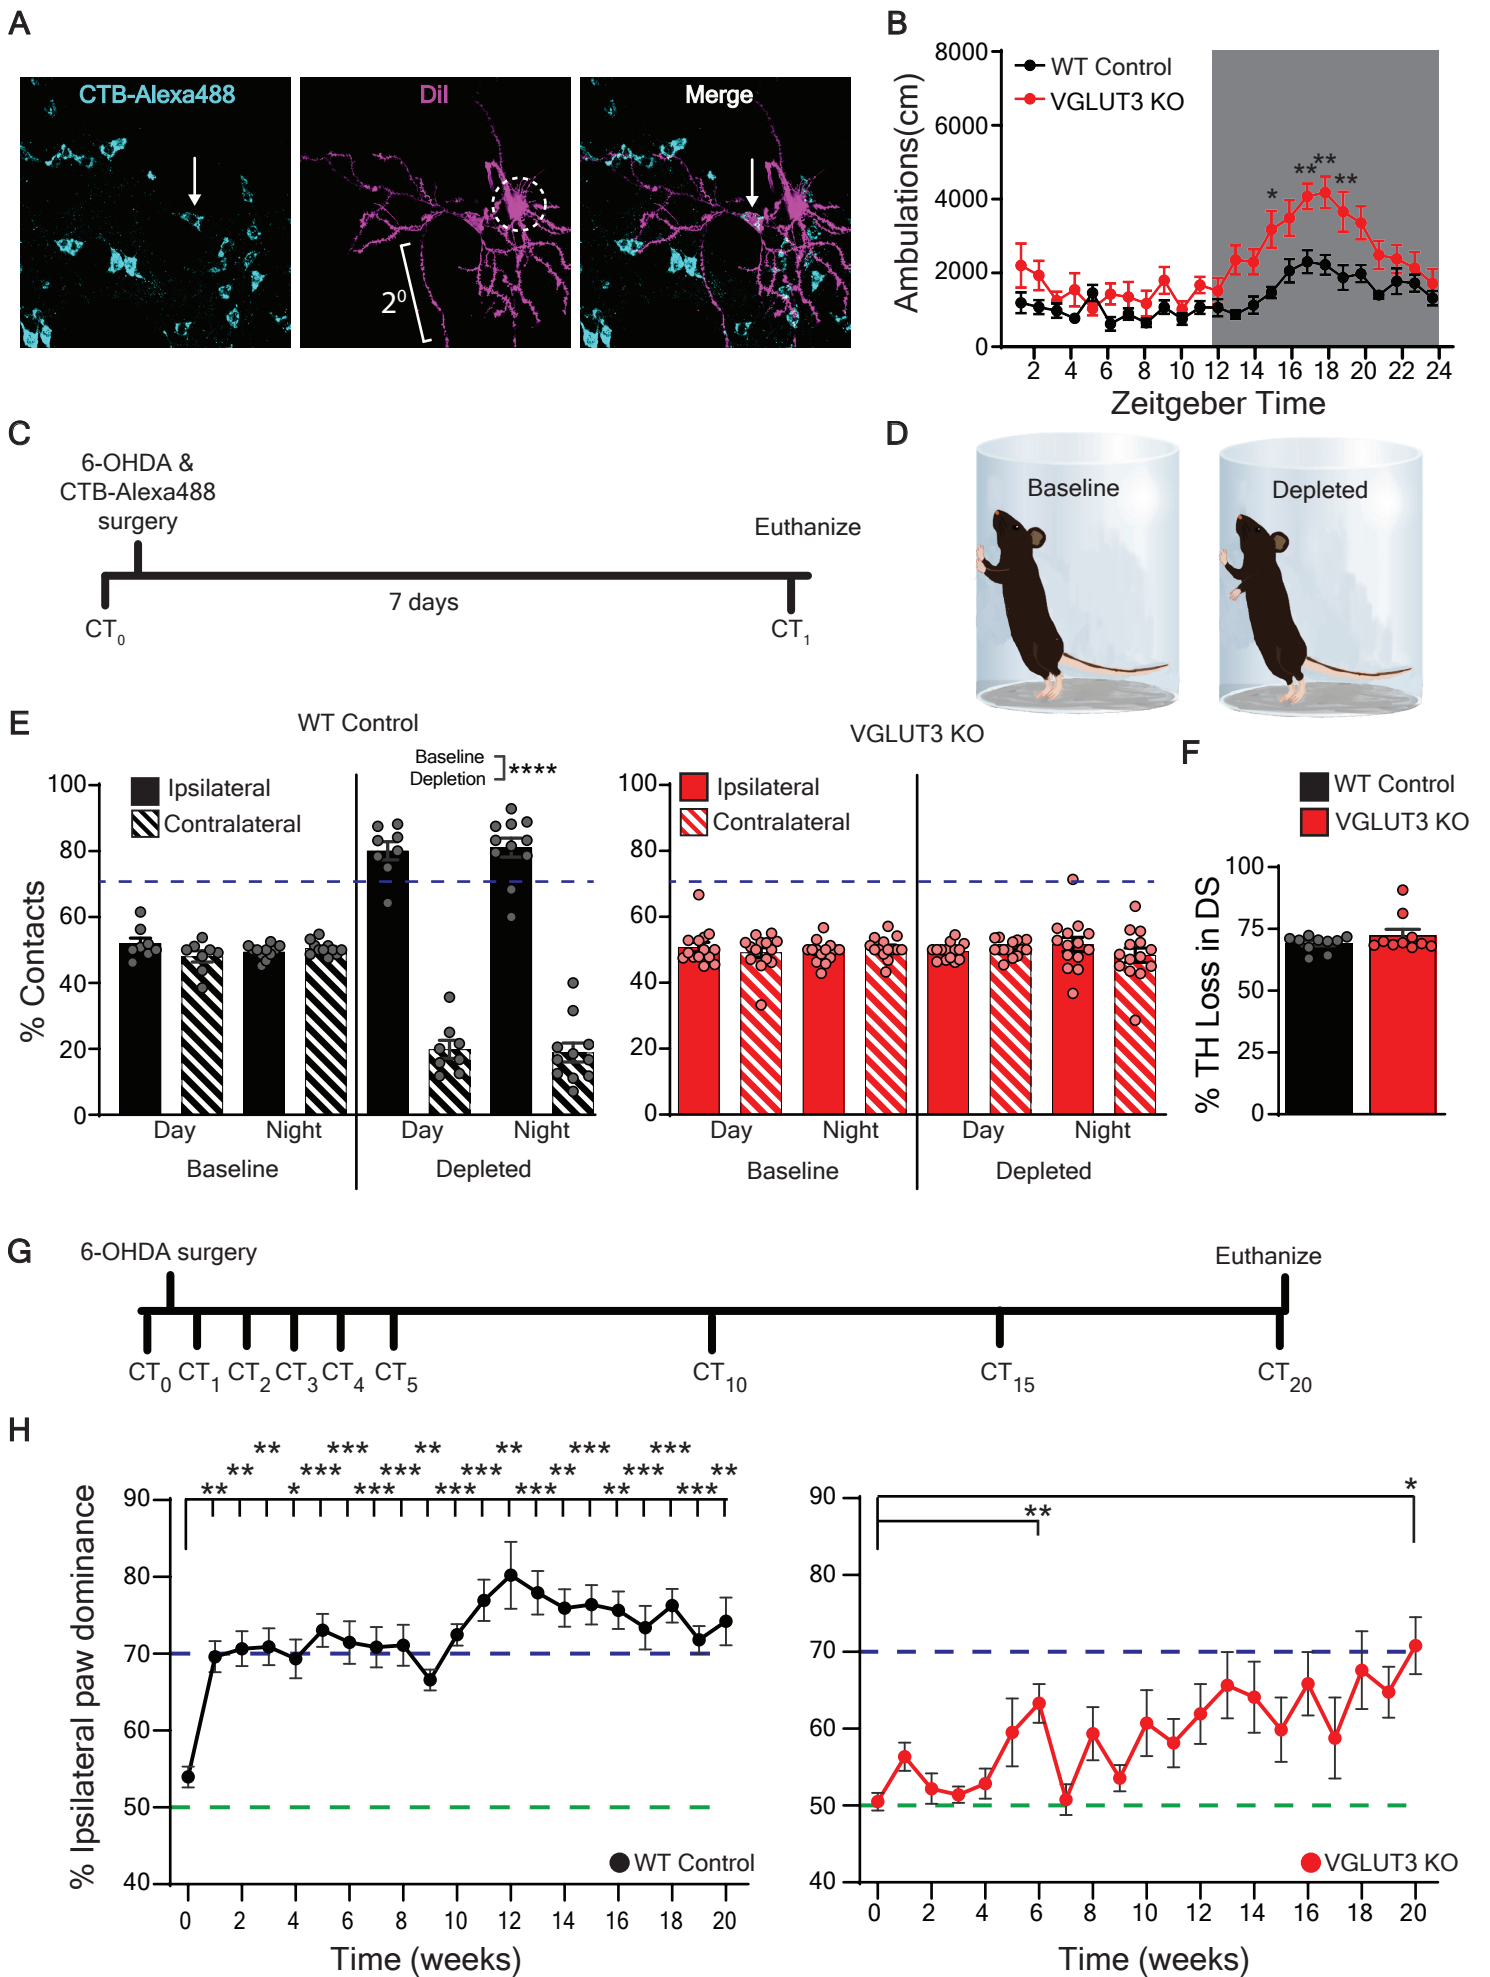

Figure S1

**A**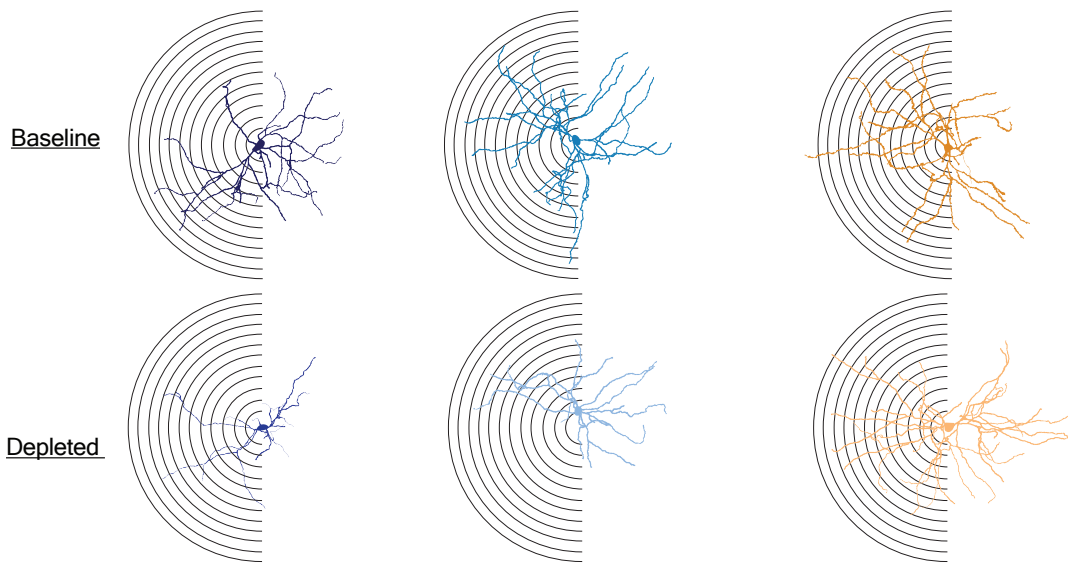**B**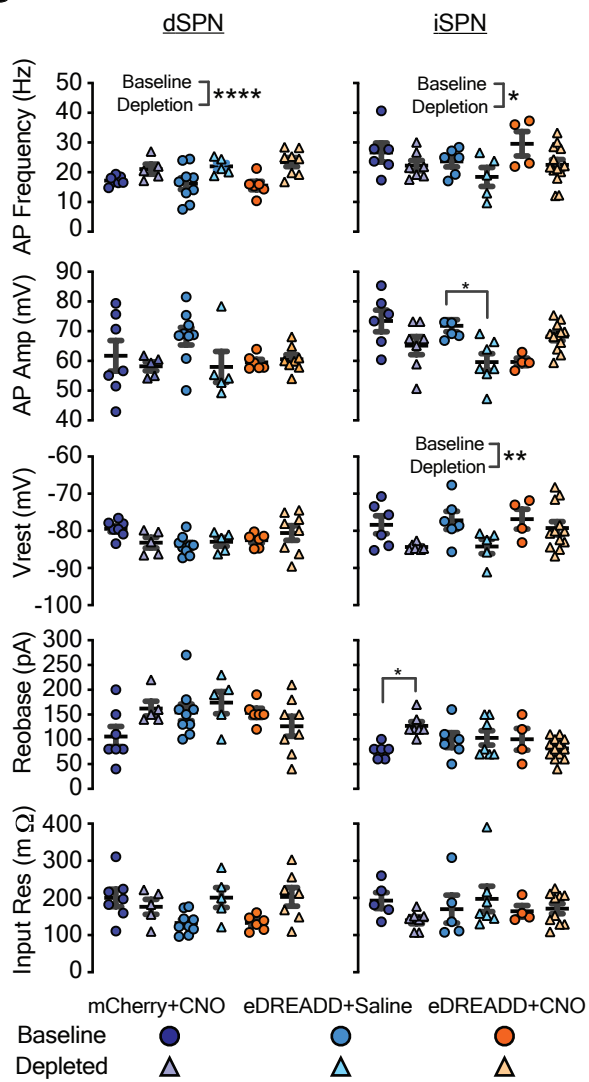**C**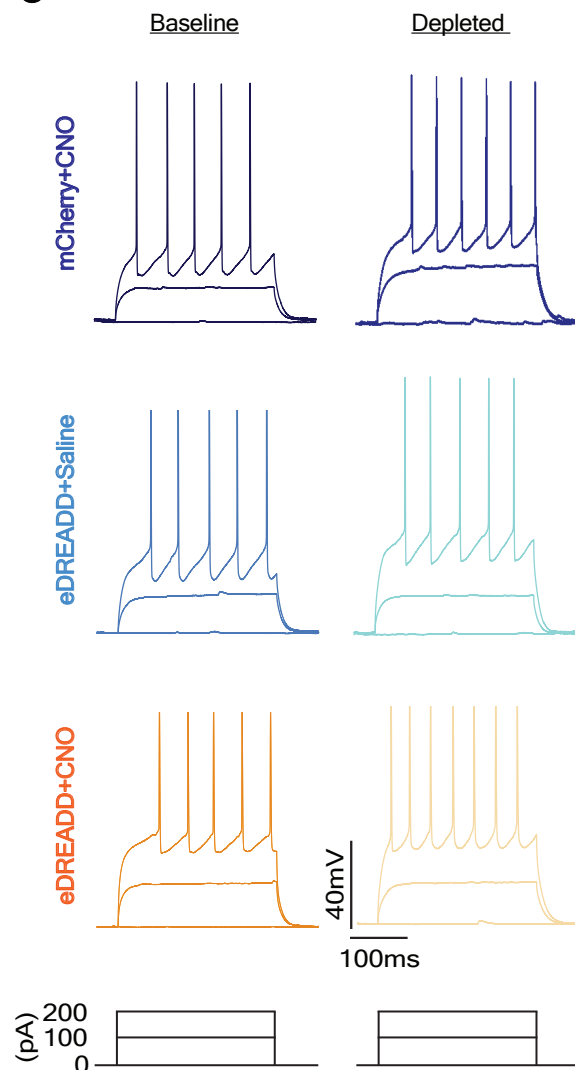

Figure S2

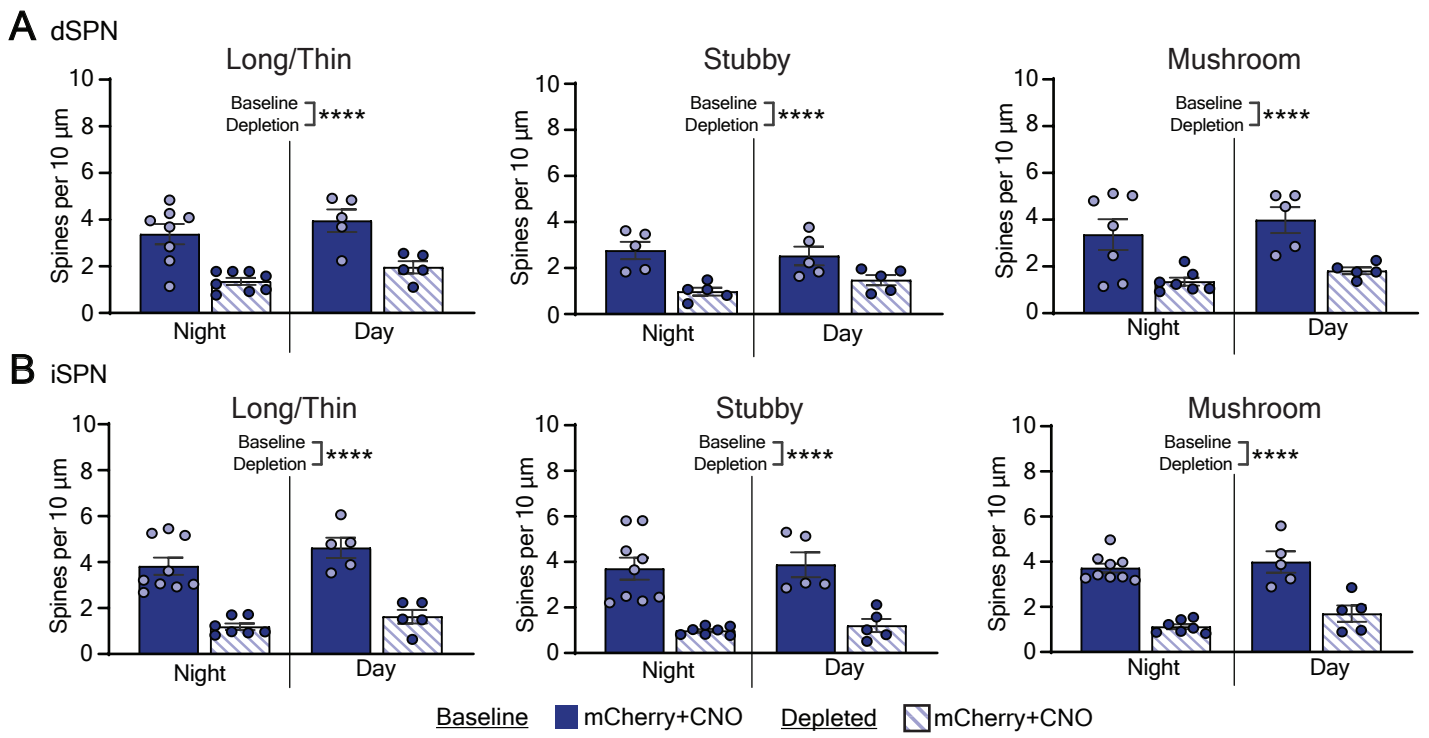

Figure S3
